# Supplementary material for: Tobacco Use Status and Temptation to Try E-Cigarettes among a Sample of Appalachian Youth
Source: MDPI journal article supplement (doi:10.3390/ijerph18136755), 2021-06-23
Supplement: s1 [file s1]

**Supplementary Table S1. Distributions and Means of Each E-cigarette Use Temptation Situation and the E-cigarette Use Temptation Scale (n=1047)**

|                                                                  | E-cigarette Use Temptations Response Options, n (%) |          |            |          |                      |                    |
|------------------------------------------------------------------|-----------------------------------------------------|----------|------------|----------|----------------------|--------------------|
|                                                                  | Not tempted<br>at all                               | 2        | 3          | 4        | Extremely<br>tempted | Mean (95% CI)      |
| <b>I am tempted to try electronic cigarettes:</b>                |                                                     |          |            |          |                      |                    |
| 1. While talking and relaxing                                    | 800 (76.4)                                          | 65 (6.2) | 92 (8.8)   | 46 (4.4) | 44 (4.2)             | 1.53 (1.47, 1.60)  |
| 2. When things are not going my way and I am frustrated          | 737 (70.4)                                          | 86 (8.2) | 106 (10.1) | 56 (5.4) | 62 (5.9)             | 1.68 (1.61, 1.76)  |
| 3. With friends at a party                                       | 739 (70.6)                                          | 69 (6.6) | 110 (10.5) | 61 (5.8) | 68 (6.5)             | 1.71 (1.64, 1.79)  |
| 4. When others are talking about how much they like e-cigarettes | 771 (73.6)                                          | 76 (7.3) | 102 (9.7)  | 53 (5.1) | 45 (4.3)             | 1.59 (1.52, 1.66)  |
| 5. When I am afraid I might gain weight                          | 837 (79.9)                                          | 71 (6.8) | 84 (8.0)   | 23 (2.2) | 32 (3.1)             | 1.42 (1.36, 1.47)  |
| 6. While having a good time                                      | 747 (71.4)                                          | 60 (5.7) | 109 (10.4) | 61 (5.8) | 70 (6.7)             | 1.71 (1.63, 1.78)  |
| 7. When I am very anxious and stressed                           | 739 (70.6)                                          | 70 (6.7) | 111 (10.6) | 56 (5.4) | 71 (6.8)             | 1.71 (1.64, 1.79)  |
| 8. When I want to fit in with a crowd                            | 798 (76.2)                                          | 89 (8.5) | 96 (9.2)   | 33 (3.2) | 31 (3.0)             | 1.48 (1.42, 1.54)  |
| 9. When I want to know how an e-cigarette tastes                 | 715 (68.3)                                          | 74 (7.1) | 103 (9.8)  | 89 (8.5) | 66 (6.3)             | 1.77 (1.70, 1.85)  |
| 10. When I want to lose weight                                   | 844 (80.6)                                          | 66 (6.3) | 86 (8.2)   | 18 (1.7) | 33 (3.2)             | 1.40 (1.35, 1.46)  |
| 11. When my friends ask if I want to try an e-cigarette          | 748 (71.4)                                          | 69 (6.6) | 119 (11.4) | 53 (5.1) | 58 (5.5)             | 1.67 (1.59, 1.73)  |
| 12. When it is difficult to refuse an e-cigarette                | 785 (75.0)                                          | 63 (6.0) | 106 (10.1) | 33 (3.2) | 60 (5.7)             | 1.59 (1.52, 1.66)  |
| <b>E-cigarette Use Temptation Scale</b>                          |                                                     |          |            |          |                      | 19.27 (18.6, 20.0) |

**Supplementary Table S2. Test for Internal Reliability of the 12 E-cigarette Use Temptation Items**

|                                                                  | Cronbach's alpha |
|------------------------------------------------------------------|------------------|
| <b>I am tempted to try electronic cigarettes...</b>              |                  |
| 1. While talking and relaxing                                    | 0.9607           |
| 2. When things are not going my way and I am frustrated          | 0.9596           |
| 3. With friends at a party                                       | 0.9590           |
| 4. When others are talking about how much they like e-cigarettes | 0.9586           |
| 5. When I am afraid I might gain weight                          | 0.9627           |
| 6. While having a good time                                      | 0.9594           |
| 7. When I am very anxious and stressed                           | 0.9592           |
| 8. When I want to fit in with a crowd                            | 0.9612           |
| 9. When I want to know how an e-cigarette tastes                 | 0.9605           |
| 10. When I want to lose weight                                   | 0.9626           |
| 11. When my friends ask if I want to try an e-cigarette          | 0.9586           |
| 12. When it is difficult to refuse an e-cigarette                | 0.9597           |
| <b>E-cigarette Use Temptation Scale</b>                          | <b>0.9634</b>    |

**Supplementary Table S3. Factorial ANOVA of Main and Interaction Effects of Sociodemographic Characteristics and Tobacco Use Status on Temptation to Use E-cigarettes**

| Source of Variance                         | Partial Sum of Squares | df    | Mean Square | F     | <i>P</i> |
|--------------------------------------------|------------------------|-------|-------------|-------|----------|
| Tobacco use status                         | 15131.60               | 2     | 7565.80     | 88.62 | <0.001   |
| Gender                                     | 64.41                  | 1     | 64.41       | 0.75  | 0.38     |
| Race/ethnicity                             | 587.70                 | 1     | 587.70      | 6.88  | 0.009    |
| School type                                | 460.99                 | 1     | 460.99      | 5.40  | 0.020    |
| State                                      | 896.07                 | 2     | 448.04      | 5.25  | 0.005    |
| Household tobacco users                    | 218.40                 | 1     | 218.40      | 2.56  | 0.11     |
| Tobacco use status*gender                  | 795.55                 | 2     | 397.78      | 4.66  | 0.010    |
| Tobacco use status*race/ethnicity          | 507.56                 | 2     | 253.78      | 2.97  | 0.052    |
| Tobacco use status*school type             | 355.29                 | 2     | 177.64      | 2.08  | 0.13     |
| Tobacco use status*state                   | 545.30                 | 4     | 136.32      | 1.60  | 0.17     |
| Tobacco use status*household tobacco users | 388.00                 | 2     | 194.00      | 2.27  | 0.10     |
| Residual                                   | 87594.89               | 1,026 | 85.38       |       |          |

\* refers to interaction term

**Supplementary Table S4. Adjusted Group Means of the Relationship Between Tobacco Use Status and Temptation to Try E-cigarettes by Level of Gender or Race/Ethnicity**

| Interactions                                           | Adjusted Group Means | 95% CI       | <i>P</i> |
|--------------------------------------------------------|----------------------|--------------|----------|
| <b>Tobacco Use Status and Gender</b>                   |                      |              |          |
| Never use*female                                       | 14.29                | 12.92, 15.66 | <0.001   |
| Never use*male                                         | 15.29                | 13.99, 16.59 | <0.001   |
| Ever non-e-cigarette use*female                        | 22.29                | 18.24, 26.34 | <0.001   |
| Ever non-e-cigarette use*male                          | 22.48                | 18.51, 26.46 | <0.001   |
| Ever e-cigarette use*female                            | 32.64                | 30.38, 34.90 | <0.001   |
| Ever e-cigarette use*male                              | 29.41                | 27.26, 31.57 | <0.001   |
| <b>Tobacco Use Status and Race/Ethnicity</b>           |                      |              |          |
| Never use*white                                        | 14.55                | 13.76, 15.34 | <0.001   |
| Never use*racial/ethnic minority groups                | 15.03                | 12.94, 17.11 | <0.001   |
| Ever non-e-cigarette use*white                         | 17.99                | 16.11, 19.87 | <0.001   |
| Ever non-e-cigarette use*racial/ethnic minority groups | 26.78                | 19.87, 33.70 | <0.001   |
| Ever e-cigarette use*white                             | 30.68                | 29.41, 31.95 | <0.001   |
| Ever e-cigarette use*racial/ethnic minority groups     | 31.37                | 27.85, 34.90 | <0.001   |

\* refers to interaction term
